# Supplementary material
Source: PubMed Central journal article supplement (PMC2741015)

Supplemental fig 1

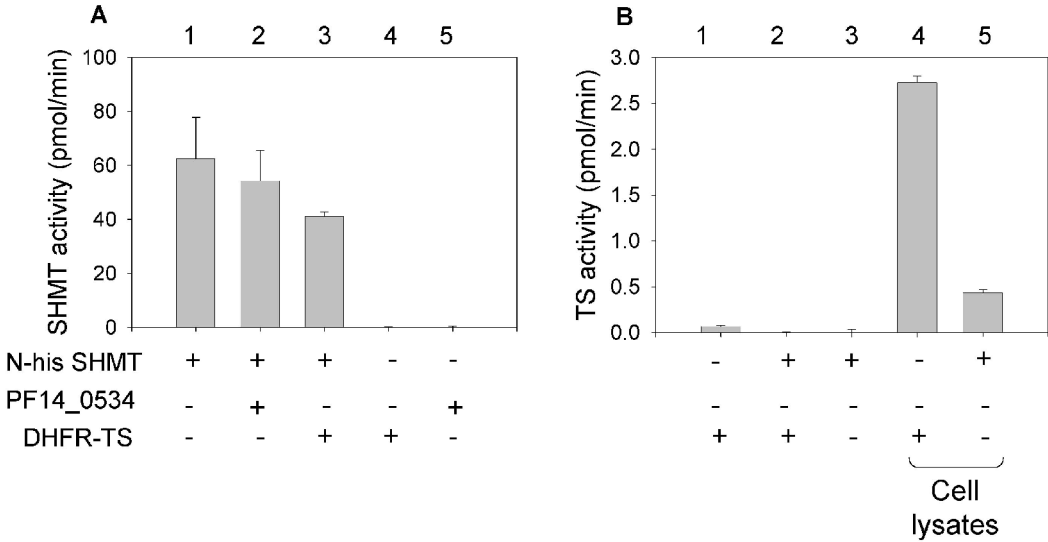

Supplement: NIHMS137423-supplement-01.pdf [file NIHMS137423-supplement-01.pdf]
